# Supplementary material for: Examination of Influenza Specific T Cell Responses after Influenza Virus Challenge in Individuals Vaccinated with MVA-NP+M1 Vaccine
Source: PLoS One. 2013 May 3;8(5):e62778. doi: 10.1371/journal.pone.0062778 (PMC3643913; doi:10.1371/journal.pone.0062778)
Supplement: Table S1 — Summary of repeated measures ANOVA p values of marker analysis on M158–66 specific CD8 T cells after vaccination and/or challenge. (DOC) [file pone.0062778.s002.doc]

Supplementary Table 1. Summary of repeated measures ANOVA p values of marker analysis on M158-66 specific CD8 T cells after vaccination and/or challenge.

| Markera | Vaccineb | Timec | Interactiond |
| --- | --- | --- | --- |
| CD57 | 0.00704 | 0.085 | 0.333 |
| CD28 | 0.166 | 1.33e-05 | 0.0947 |
| CD38 | 0.252 | 0.00015 | 0.632 |
| Pfp D48 | 0.00275 | 0.00870 | 0.126 |
| GrzA | 0.00250 | 0.000201 | 0.00879 |
| GrzB | 0.0971 | 5.13e-05 | 0.0343 |
| BCL2 | 0.00313 | 1.34e-05 | 0.113 |
| Ki67 | 0.230 | 0.0039 | 0.265 |
| CD27/28 | 0.618 | 0.0001 | 0.592 |
| CD27 | 0.942 | 0.0249 | 0.0868 |
| HLA-DR | 0.833 | 0.106 | 0.824 |
| Pfp dG9 | 0.254 | 0.0143 | 0.233 |
| CCR5 | 0.970 | 5.88e-5 | 0.918 |
| CD45RA | 0.0943 | 0.0122 | 0.228 |
| CD45RO | 0.389 | 0.00176 | 0.0288 |

aAnalysis of markers examined on antigen specific T cells after vaccination with an NP+M1 vaccine or control donors followed by challenge with intranasal influenza vaccine.

bp value with respect to variation caused by vaccine.

cP values with respect to variation attributable to time.

dp of both time and vaccine together.
